# Supplementary material for: The influence of land use and management on the behaviour and persistence of soil organic carbon in a subtropical Ferralsol
Source: Copernicus journal article supplement (doi:10.5194/soil-10-451-2024), 2024-07-04
Supplement: Supplementary file 1 [file soil-10-451-2024-supplement.pdf]

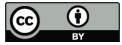

*Supplement of*

## **The influence of land use and management on the behaviour and persistence of soil organic carbon in a subtropical Ferralsol**

**Laura Hondroudakis et al.**

*Correspondence to:* Peter M. Kopittke ([p.kopittke@uq.edu.au](mailto:p.kopittke@uq.edu.au))

The copyright of individual parts of the supplement might differ from the article licence.

**Supplementary Table S1:** Background and land use history for the soils collected from Kingaroy adapted from Zhang et al. (2020).

| Land Use           | Time since last land use change (y) | Vegetation                                                                   | Fertiliser                                                                                                                                                                                                                                                                                                                                            |
|--------------------|-------------------------------------|------------------------------------------------------------------------------|-------------------------------------------------------------------------------------------------------------------------------------------------------------------------------------------------------------------------------------------------------------------------------------------------------------------------------------------------------|
| Remnant Vegetation | N/A                                 | Native Vine Scrub                                                            | N/A                                                                                                                                                                                                                                                                                                                                                   |
| Plantation         | 21                                  | Spotted gum ( <i>Corymbia citriodora</i> spp. <i>Variiegata</i> )            | Nil                                                                                                                                                                                                                                                                                                                                                   |
| Cropped            | 72                                  | Peanut ( <i>Arachis hypogaea</i> ) – maize ( <i>Zea mays</i> )               | 1950–2010: Nil<br>2010–2017: 50 kg ha <sup>-1</sup> P ha <sup>-1</sup> as MOP and 12 kg as diammonium phosphate (DAP) plus Petrik micronutrients at planting for peanuts. 70 kg ha <sup>-1</sup> urea, 40 kg ha <sup>-1</sup> P ha <sup>-1</sup> as MOP and 9.4 kg as DAP, 4 kg ha <sup>-1</sup> Zn plus Petrik micronutrients at planting for maize. |
| Pasture            | 39                                  | Wiregrass ( <i>Aristida ramosa</i> )/ Rhodes grass ( <i>Chloris gayana</i> ) | Nil                                                                                                                                                                                                                                                                                                                                                   |

**Supplementary Table S2:** The average concentration of C, N and C/N ratios of each soil fraction from four land uses, separated by density fractionation and elemental concentration determined by IRMS. fPOM is free particulate organic matter, oPOM is aggregate-occluded particulate organic matter, coarse fraction-MAOM is coarse grained (>53  $\mu\text{m}$ ) mineral-associated organic matter, and fine fraction-MAOM is fine grained (>53  $\mu\text{m}$ ) mineral-associated organic matter. Standard error is reported in parentheses ( $n = 5$ ).

|                                      |                          | Land Use              |             |              |              |
|--------------------------------------|--------------------------|-----------------------|-------------|--------------|--------------|
|                                      |                          | Remnant<br>Vegetation | Pasture     | Plantation   | Cropped      |
| <b>fPOM</b>                          | C ( $\text{mg g}^{-1}$ ) | 254 (8.30)            | 224 (12.4)  | 225 (13.4)   | 242 (13.6)   |
|                                      | N ( $\text{mg g}^{-1}$ ) | 18.1 (0.66)           | 12.1 (0.71) | 11.0 (0.34)  | 12.1 (1.10)  |
|                                      | C/N ratio                | 14.1 (0.15)           | 18.6 (0.67) | 20.4 (0.64)  | 20.5 (1.73)  |
| <b>oPOM</b>                          | C ( $\text{mg g}^{-1}$ ) | 361 (13.9)            | 360 (3.39)  | 358 (4.77)   | 383 (7.60)   |
|                                      | N ( $\text{mg g}^{-1}$ ) | 24.2 (0.61)           | 23.1 (0.24) | 17.9 (0.18)  | 19.1 (1.07)  |
|                                      | C/N ratio                | 14.9 (0.25)           | 15.6 (0.27) | 20.0 (0.348) | 20.3 (1.33)  |
| <b>Coarse<br/>fraction-<br/>MAOM</b> | C ( $\text{mg g}^{-1}$ ) | 15.6 (1.17)           | 8.38 (1.26) | 8.43 (1.16)  | 2.95 (0.21)  |
|                                      | N ( $\text{mg g}^{-1}$ ) | 1.25 (0.09)           | 0.65 (0.09) | 0.600 (0.09) | 0.225 (0.03) |
|                                      | C/N ratio                | 12.5 (0.19)           | 12.8 (0.29) | 14.2 (0.39)  | 13.3 (0.97)  |
| <b>Fine fraction-<br/>MAOM</b>       | C ( $\text{mg g}^{-1}$ ) | 57.5 (0.76)           | 39.5 (1.58) | 47.6 (1.29)  | 18.3 (0.38)  |
|                                      | N ( $\text{mg g}^{-1}$ ) | 6.26 (0.11)           | 4.23 (0.14) | 4.75 (0.21)  | 1.95 (0.03)  |
|                                      | C/N ratio                | 9.23 (0.06)           | 9.34 (0.09) | 10.0 (0.18)  | 9.36 (0.09)  |

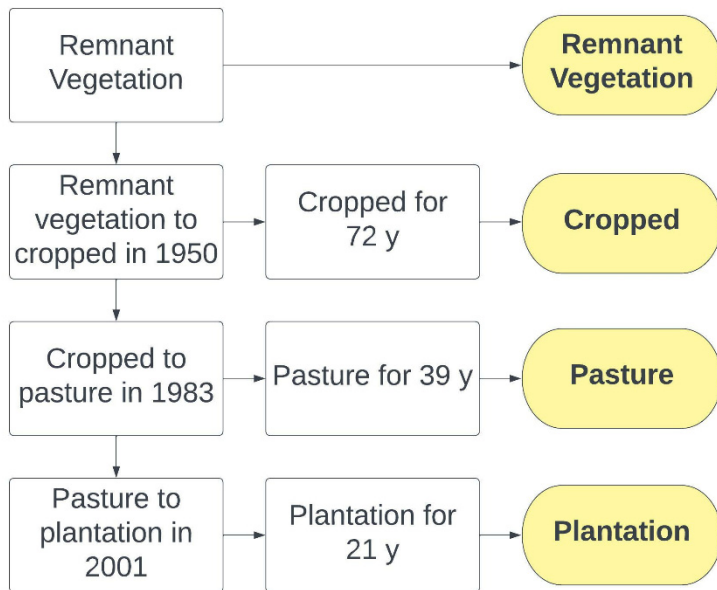

**Supplementary Figure S1:** A Summary of the land use change history of the four land uses sampled from the Kingaroy study site [updated from Zhang et al. (2020)].

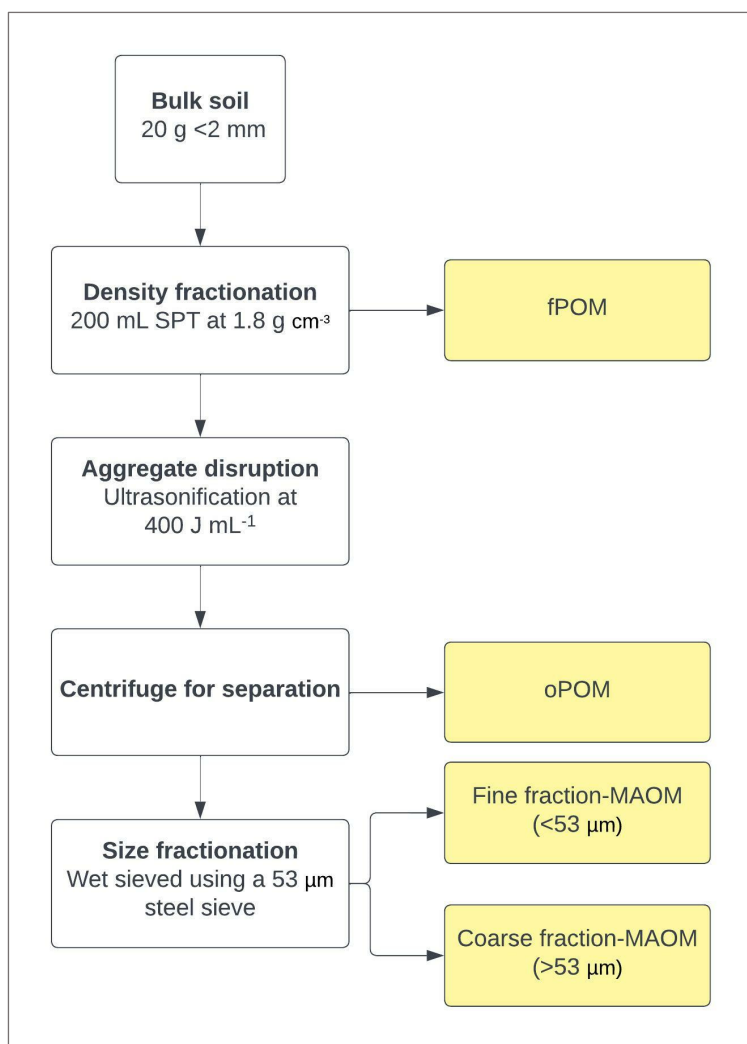

**Supplementary Figure S2:** Density fractionation and size fractionation process used to separate the bulk soil into four fractions: free particulate organic matter (fPOM), aggregate-occluded organic matter (oPOM), coarse mineral-associated organic matter (coarse fraction-MAOM) and fine mineral-associated organic matter (fine fraction-MAOM).

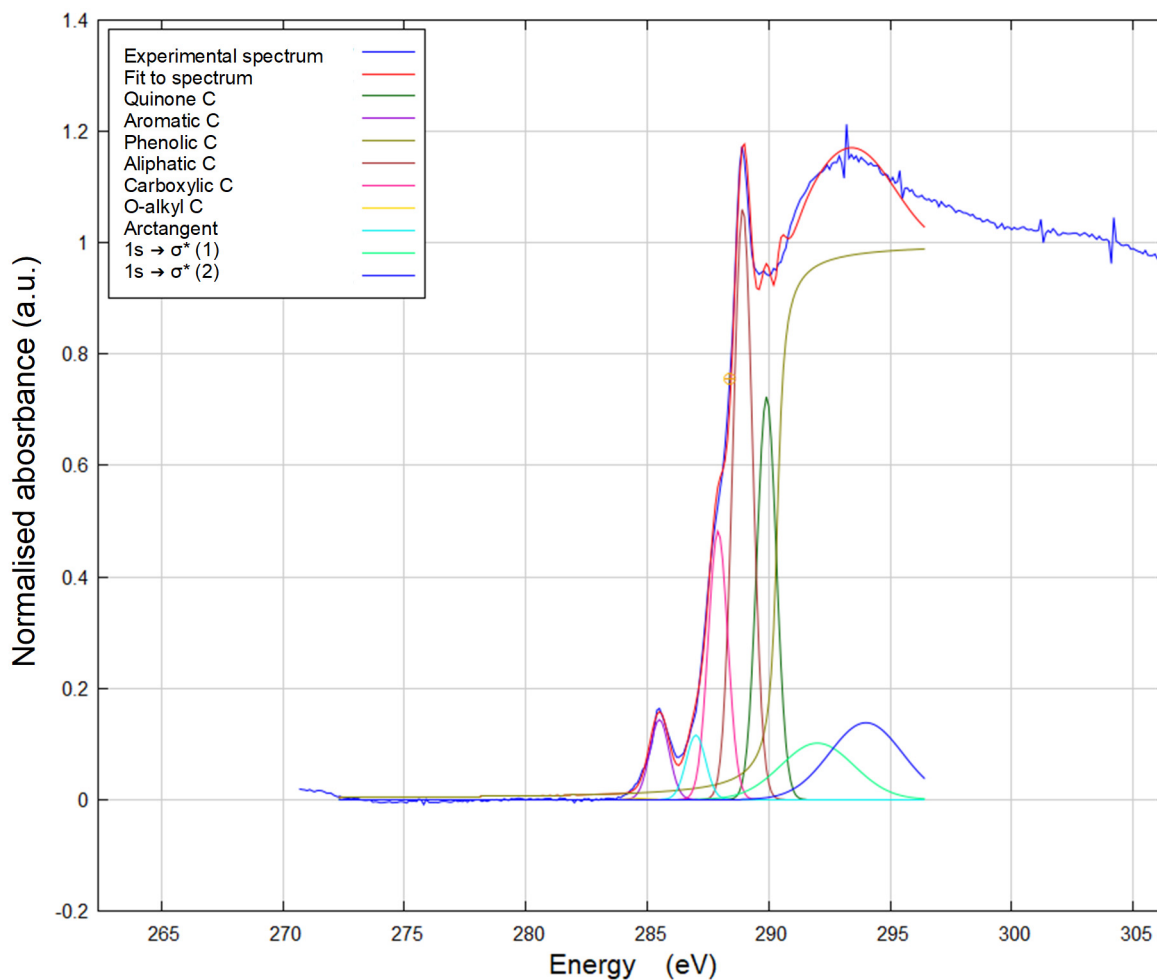

**Supplementary Figure S3:** Peak fitting of NEXAFS spectra showing the six Gaussian peaks for each functional group (G1 284.7 eV, G2 285.5 eV, G3 287.0 eV, G4 287.9 eV, G5 288.9 eV, 289.9 eV), an arctangent function (290 eV) and two additional Gaussian peaks representing the  $1s \rightarrow \sigma^*$  transitions of saturated single covalent bonds and direct inner-shell ionization (G7 292 eV, G8 294 eV).

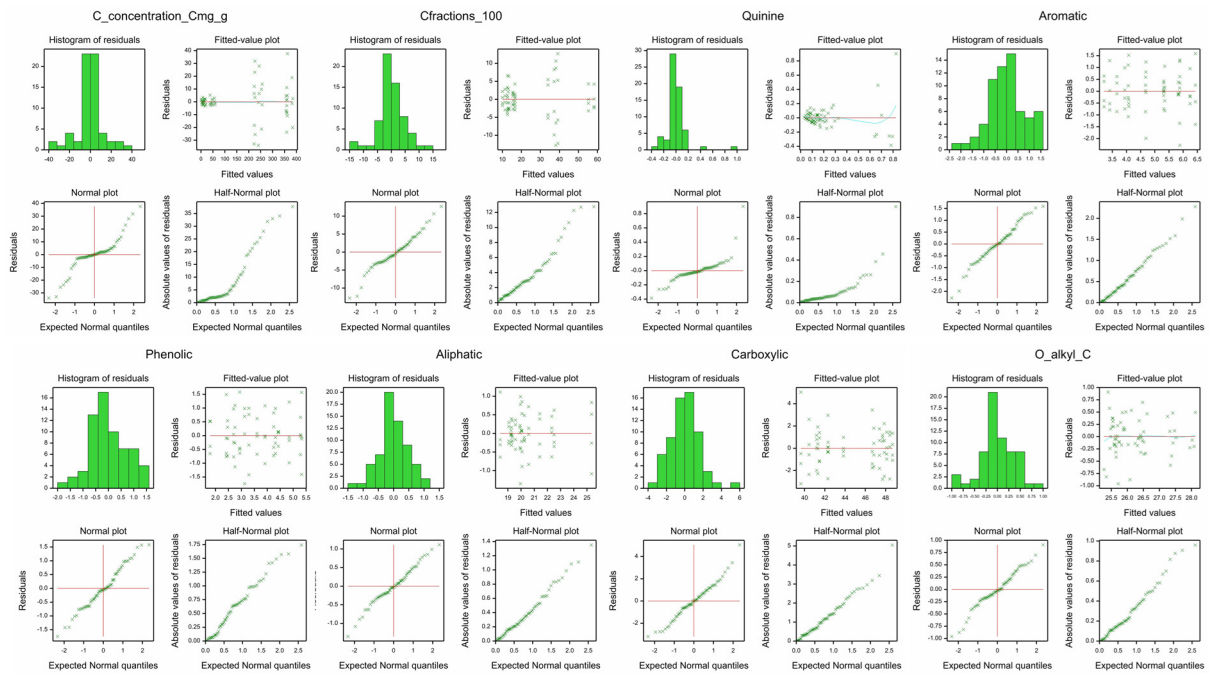

**Supplementary Figure S4:** ANOVA checked for the normal distribution of residuals and homogeneity of variances.

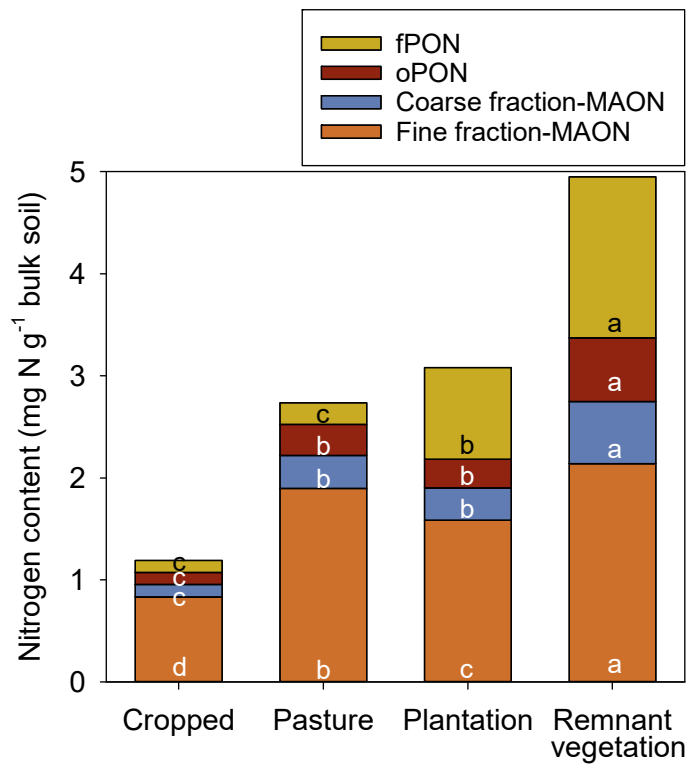

**Supplementary Figure S5:** The nitrogen content for each soil fraction within the bulk soil from topsoils (0-10cm) collected from four land uses. fPON is free particulate organic nitrogen, oPON is aggregate-occluded particulate organic nitrogen, coarse fraction-MAON is coarse grained (> 53 $\mu$ m) mineral-associated organic nitrogen and coarse fraction-MAON is fine grained (> 53 $\mu$ m) mineral-associated organic nitrogen. Lower-case letters indicate least significant differences (95 % confidence level for each comparison) between the same fractions across land uses.



## **Supplementary References**

Zhang, Y., Bhattacharyya, R., Dalal, R. C., Wang, P., Menzies, N. W., and Kopittke, P. M.:  
Impact of land use change and soil type on total phosphorus and its fractions in soil  
aggregates, *Land Degrad. Dev.*, 31, 828-841, 10.1002/ldr.3501, 2020.
